# Supplementary material for: Theoretical study of Mo2N supported transition metal single-atom catalyst for OER/ORR bifunctional electrocatalysis
Source: Royal Society of Chemistry journal article supplement (doi:10.1039/d3cp02565a), 2023-01-01
Supplement: d3cp02565a1.pdf [file d3cp02565a1.pdf]

**Theoretical study of Mo<sub>2</sub>N supported transition metal  
single-atom catalyst for OER/ORR bifunctional  
electrocatalysis**

Long Lin <sup>a,b</sup>, Xiaoqin Long <sup>a</sup>, Xinyu Yang <sup>a</sup>, Pei Shi <sup>a</sup>, Linlin Su, <sup>c,\*</sup>

<sup>a</sup> *Henan Key Laboratory of Materials on Deep-Earth Engineering, School of Materials Science and Engineering, Henan Polytechnic University, Jiaozuo 454000, China*

<sup>b</sup> *School of Materials Science and Engineering, Henan Polytechnic University, Jiaozuo 454000, Henan Province, China*

<sup>c</sup> *Liaoning Key Materials Laboratory for Railway, School of Materials Science and Engineering, Dalian Jiaotong University, Dalian 116028, Liaoning Province, China*

## DFT Calculation

For ORR calculation, the four electrons pathway by which the ORR occurs under base condition are generally reported to proceed according to the following steps [S1]:

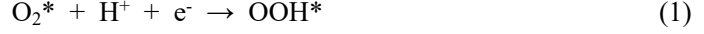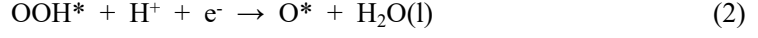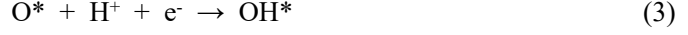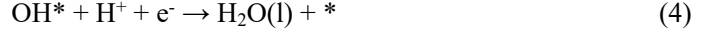

In which \* denoted an activity site on the catalyst, (l) and (g) represented liquid and gas phases, respectively.

The OER process can be regarded as the inverse process of the ORR process, which can proceed via the following pathway:

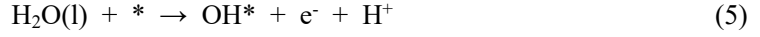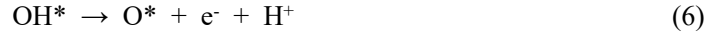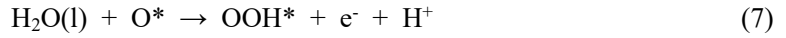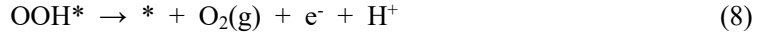

The computational hydrogen electrode (CHE) model [1,2] was used to compute the change in the Gibbs free energy change ( $\Delta G$ ) of each elementary step of ORR/OER, in which one-half of the chemical potential of hydrogen molecule is equal to the chemical potential of proton-electron pair. In this CHE model, the  $\Delta G$  value of each elementary step was determined by:  $\Delta G = \Delta E + \Delta E_{\text{ZPE}} - T\Delta S$ , where  $\Delta E$  that represents the reaction energy difference of reactant and product, which can be directly computed from DFT computations.  $\Delta E_{\text{ZPE}}$  and  $\Delta S$  are the change in the zero-point energies and entropy at room temperature ( $T = 298.15\text{K}$ ), which can be computed from the vibrational frequencies. In this work, the pH of the solution is assumed to be zero for an acid medium and the free energy contribution caused by changing the H concentration was neglected. The entropies of the free molecules, such as  $\text{H}_2$  and  $\text{H}_2\text{O}$ , were taken from the NIST database. Since the DFT method failed to accurately describe the high-spin ground state of the  $\text{O}_2$  molecule, the Gibbs free energy of  $\text{O}_2$  ( $G_{\text{O}_2}$ ) will be obtained by  $G_{\text{O}_2} = G_{\text{H}_2\text{O}} - 2G_{\text{H}_2} + 4.92 \text{ eV}$ . The effects of electrode potential ( $U$ ) and pH on ORR/OER can be treated as the energy shifts to free energy change in the electrochemical steps:  $\Delta G_U = -eU$  and  $\Delta G_{\text{pH}} = k_B T \ln 10 \times \text{pH}$ . In this work the value of pH was assumed to be zero for acidic medium. The thermodynamic activity of ORR/OER was evaluated by examining the overpotential of the reaction ( $\eta$ ) according to the following equations:

$$\eta^{\text{ORR}} = (\Delta G_{\text{ORR}/\text{e}}^{\text{max}}) + 1.23$$

$$\eta^{\text{OER}} = (\Delta G_{\text{OER}/\text{e}}^{\text{max}}) - 1.23$$

where  $\Delta G$  represents the free energy change of reaction (1)-(8), 1.23 is the equilibrium potential of ORR/OER. According to the above definition, a small  $\eta$  on a given catalyst suggests a higher catalytic activity for ORR/OER.

## The Solvation effect

Based on previous studies, a single ice-like bilayer of water is a reasonable model able to provide sufficient water molecules to describe solvation effects, As shown in Fig.S3. We also

calculate the solvation energy ( $\Delta Sol$ ), whose energy correction is defined by the following equations (equation 1-2):

$$\Delta Sol = E_{tot} - E_{(sur + adsorbate)} - E_{water} + E_{(sur + water)} \quad (1)$$

$$\Delta G = \Delta E + \Delta ZPE - T\Delta S + \Delta Sol + xeU - 4eU \quad (2)$$

where  $E_{tot}$ ,  $E_{(sur + adsorbate)}$ ,  $E_{water}$ , and  $E_{(sur + water)}$  represent the computed electronic energies of the surface with the adsorbates as well as the single water layer, the surface with the adsorbates only, the single water layer, and the surface with single water layer only, respectively. The number of transferred electrons  $x$  was 1-3 for the  $OOH^*$ ,  $O^*$ , and  $OH^*$  intermediates, respectively.

The calculated results are shown in Table.S3. The results show that the intermediates involved in ORR and OER are stabilized to varying degrees by the interaction of hydrogen bonds with environmental water molecules. The figure shows that  $OOH^*$  has a larger solvation energy than  $OH^*$ . The adsorption of these intermediates can maintain the binding network in the water bilayer by forming hydrogen bonds with adjacent  $H_2O$  molecules. The hydrogen bond interaction between the water bimolecular layer and the intermediate has a certain influence overall. In the ORR process of  $Au@Mo_2N$ , the overpotential changes by 0.02 V. In addition, the OER overpotential shifted from 0.37 V to 0.56 V. The above results show that although water does affect the absolute adsorption energy and free energy of the reaction, it does not significantly affect the overall trend of intrinsic catalytic properties.

**Table S1.** Gibbs adsorption free energies of OH\*, O\* and OOH\* ( $\Delta G_{\text{OH}^*}$ ,  $\Delta G_{\text{O}^*}$  and  $\Delta G_{\text{OOH}^*}$ ) as well as the overpotentials for OER/ORR( $\eta^{\text{ORR/OER}}$ ) on TM@Mo<sub>2</sub>N systems

| System               | $\Delta G_{\text{OH}^*}$ (eV) | $\Delta G_{\text{O}^*}$ (eV) | $\Delta G_{\text{OOH}^*}$ (eV) | $\eta^{\text{ORR}}$ (V) | $\eta^{\text{OER}}$ (V) |
|----------------------|-------------------------------|------------------------------|--------------------------------|-------------------------|-------------------------|
| Fe@Mo <sub>2</sub> N | -0.58                         | 0.41                         | 2.83                           | 1.81                    | 1.19                    |
| Co@Mo <sub>2</sub> N | -0.45                         | 0.65                         | 2.90                           | 1.68                    | 1.02                    |
| Ni@Mo <sub>2</sub> N | 0.12                          | 1.41                         | 3.28                           | 1.11                    | 0.64                    |
| Cu@Mo <sub>2</sub> N | 0.23                          | 2.27                         | 3.58                           | 1.00                    | 0.80                    |
| Zn@Mo <sub>2</sub> N | 0.04                          | 2.44                         | 3.46                           | 1.19                    | 1.16                    |
| Ru@Mo <sub>2</sub> N | -0.39                         | 0.46                         | 2.95                           | 1.62                    | 1.26                    |
| Rh@Mo <sub>2</sub> N | -0.01                         | 1.11                         | 3.30                           | 1.24                    | 0.96                    |
| Pd@Mo <sub>2</sub> N | 0.54                          | 2.17                         | 3.80                           | 0.69                    | 0.40                    |
| Ag@Mo <sub>2</sub> N | 0.92                          | 3.21                         | 4.13                           | 0.44                    | 1.06                    |
| Cd@Mo <sub>2</sub> N | 0.81                          | 2.89                         | 3.75                           | 0.42                    | 0.85                    |
| Os@Mo <sub>2</sub> N | -0.82                         | -0.18                        | 2.57                           | 2.05                    | 1.52                    |
| Ir@Mo <sub>2</sub> N | -0.49                         | 0.29                         | 2.89                           | 1.72                    | 1.37                    |
| Pt@Mo <sub>2</sub> N | 0.44                          | 1.13                         | 3.39                           | 0.79                    | 1.03                    |
| Au@Mo <sub>2</sub> N | 0.83                          | 2.31                         | 3.91                           | 0.40                    | 0.37                    |
| Hg@Mo <sub>2</sub> N | 0.71                          | 2.90                         | 4.04                           | 0.52                    | 0.95                    |

**Table.S2.** The solvation energies corrections ( $\Delta\text{Sol}$ ) and the free energies after considering the solvation effect ( $\Delta G_{\text{Sol}}$ ) on the selected catalysts (Au@Mo<sub>2</sub>N).

|                      | $\Delta\text{Sol}$ |       |       | $\Delta G_{\text{Sol}}$ |      |      |
|----------------------|--------------------|-------|-------|-------------------------|------|------|
|                      | *OOH               | *O    | *OH   | *OOH                    | *O   | *OH  |
| Au@Mo <sub>2</sub> N | -0.55              | -0.34 | -0.54 | 4.08                    | 2.29 | 0.81 |

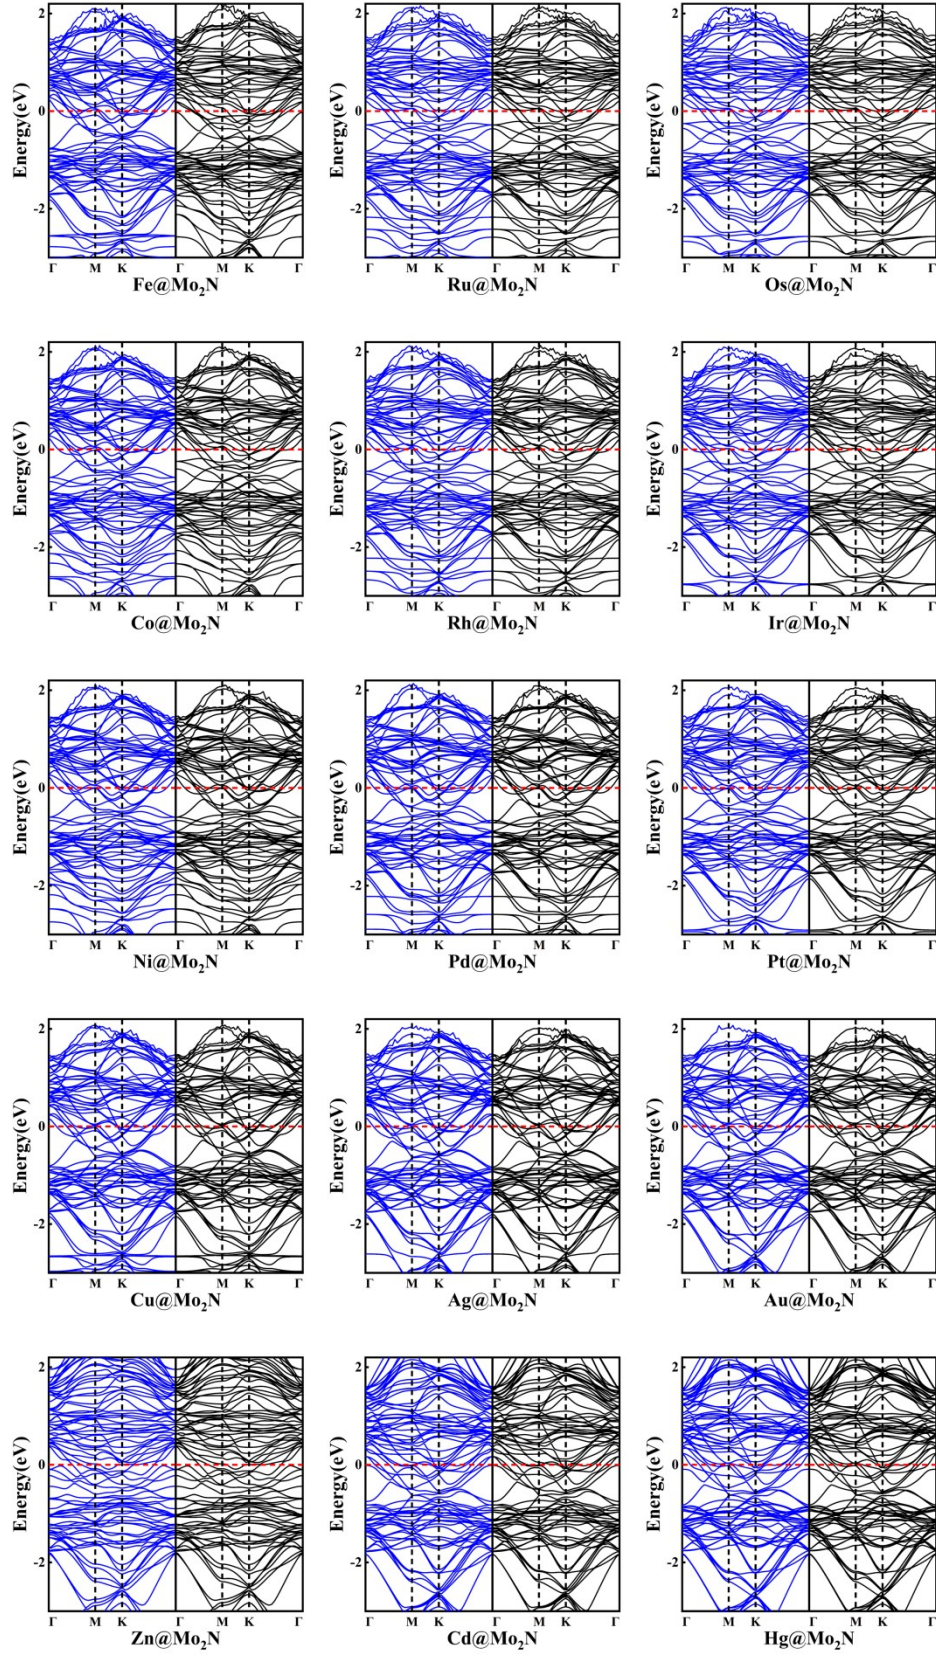

**Fig.S1.** Spin-polarized band structures of various TM-embedded Mo<sub>2</sub>N monolayers. The Fermi level is set as zero in red dashed lines.

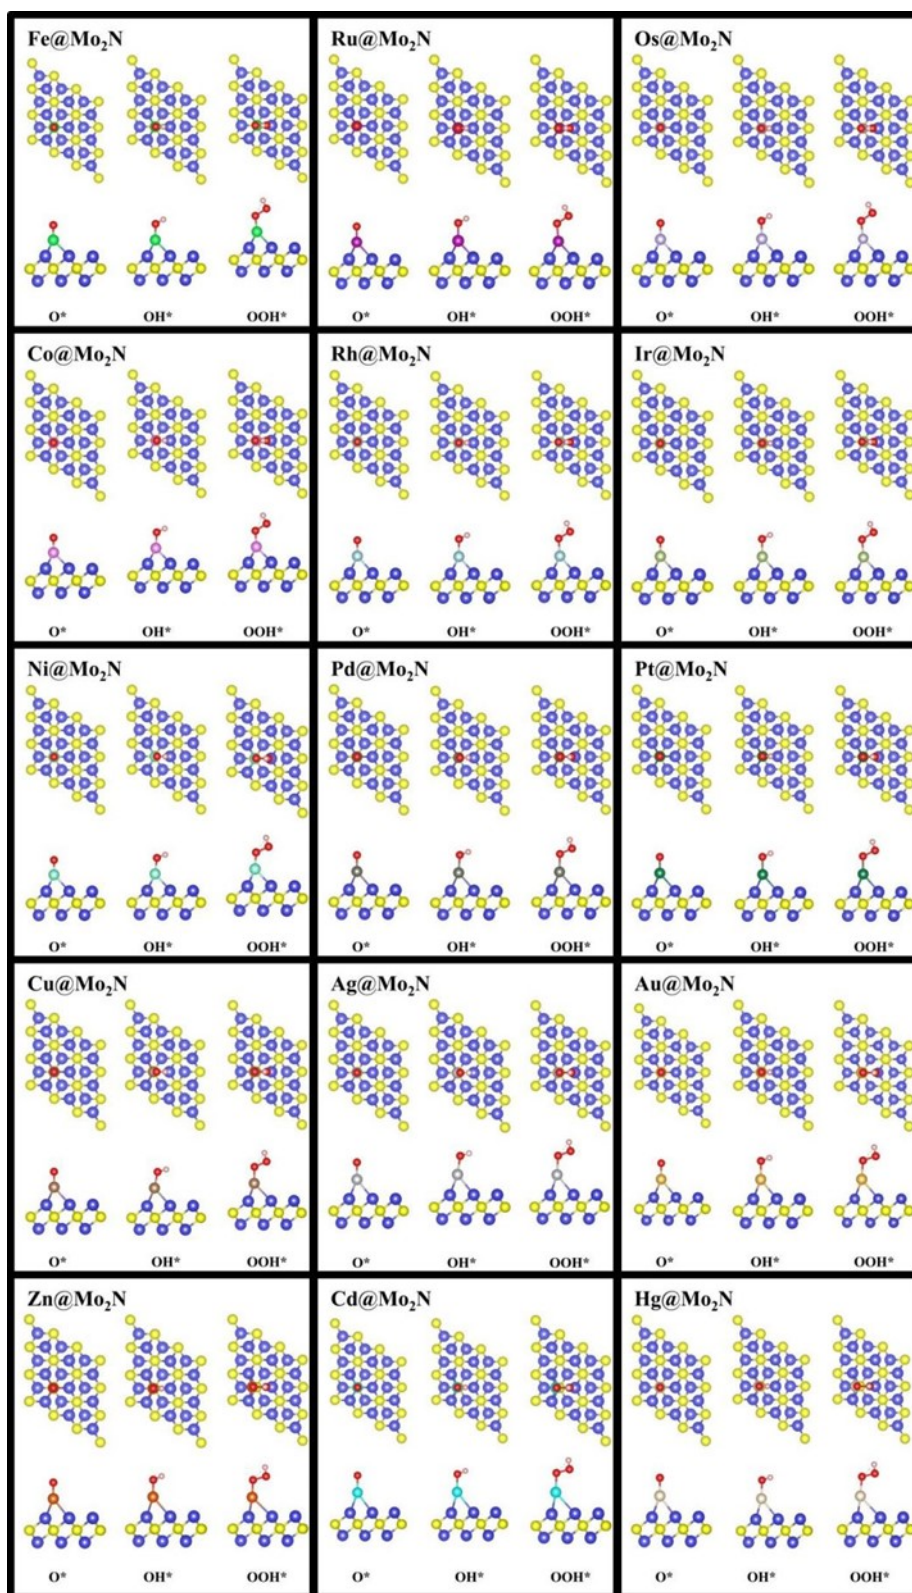

Fig.S2. Catalytic structure diagram of 15 kinds of catalyst reaction intermediates.

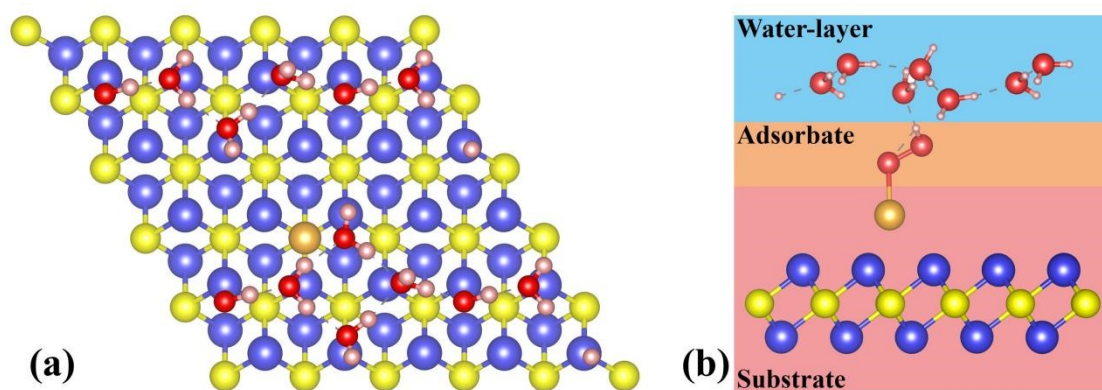

**Fig.S3.** (a) The top view of the solvation system and (b) the solvation model with adsorbed intermediates.

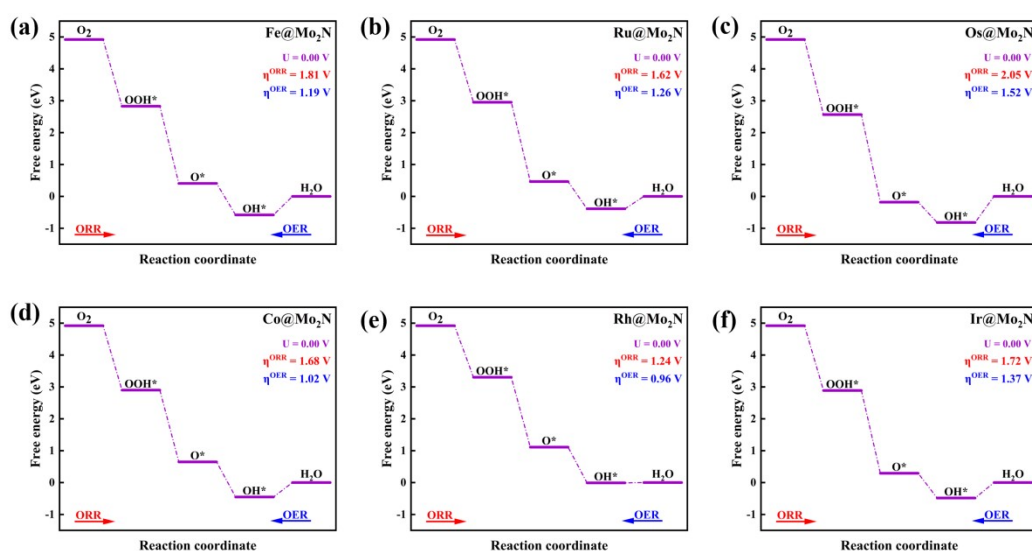

**Fig.S4.** Changes in Gibbs free energy differences ( $\Delta G$ ) of elementary reaction steps along the  $4e^-$  pathway toward ORR and OER of six excluded atoms (Fe, Ru, Os, Co, Rh, Ir).
